# Supplementary material for: A New 3D Tool for Assessing the Accuracy of Bimaxillary Surgery: The OrthoGnathicAnalyser
Source: PLoS One. 2016 Feb 22;11(2):e0149625. doi: 10.1371/journal.pone.0149625 (PMC4762705; doi:10.1371/journal.pone.0149625)
Supplement: S1 Table — All rotations (pitch, roll and yaw) were measurement in degrees. All translations were measured in millimeters. (XLSX) [file pone.0149625.s001.xlsx]

## Sheet: Blad1
patientennummer	OK_lftd	Geslacht	OK_Type	met_Kin	Dichtbijten_postop	Observer	Poging	Max_LR_Plan_gouden	Max_LR_Plan	Max_LR_real	Max_LR_Diff	Max_FB_Plan_gouden	Max_FB_Plan	Max_FB_real	Max_FB_Diff	Max_UD_plan_gouden	Max_UD_plan	Max_UD_real	Max_UD_Diff	Max_yaw_plan_gouden	Max_yaw_plan	Max_yaw_real	Max_yaw_diff	Max_roll_plan_gouden	Max_roll_plan	Max_roll_real	Max_roll_diff	Max_pitch_plan_gouden	Max_pitch_plan	Max_pitch_real	Max_pitch_diff	Mand_LR_Plan	Max_LR_real	Mand_LR_Diff	Mand_FB_Plan	Mand_FB_real	Mand_FB_Diff	Mand_UD_plan	Mand_UD_real	Mand_UD_Diff	Mand_yaw_plan	Mand_yaw_real	Mand_yaw_diff	Mand_roll_plan	Mand_roll_real	Mand_roll_diff	Mand_pitch_plan	Mand_pitch_real	Mand_pitch_diff
1	40	0	1	1	1	1	1	0	7.63e-05	-0.025177	0.0252533	2	2.00004	0.570145	-1.42989	-3	-2.99961	-4.13042	1.13081	0	-0.000166691	-1.03411	1.03394	1	1.00012	1.69665	-0.696532	10	10.0001	7.17924	2.82088	-0.744263	-0.889877	0.145615	11.3876	10.1371	-1.25047	1.75641	-0.218679	1.97509	-1.27634	-1.31946	0.0431213	1.55045	0.940188	0.610264	1.5882	-1.47554	3.06375
1	40	0	1	1	1	2	1	0	-2.29e-05	-0.0380249	0.038002	2	1.9999	0.514448	-1.48546	-3	-2.99954	-4.54053	1.541	0	4.93e-05	-1.03245	1.0325	1	1.0001	1.79281	-0.792711	10	9.99993	8.32128	1.67865	-0.744354	-1.17204	0.427689	11.3874	9.98472	-1.40263	1.75654	-0.0416524	1.79819	-1.27604	-1.14077	-0.135277	1.55059	0.336215	1.21438	1.58836	-2.25889	3.84725
1	40	0	1	1	1	2	2	0	-2.29e-05	-0.0612717	0.0612488	2	1.9999	0.597938	-1.40197	-3	-2.99954	-3.91054	0.911008	0	4.93e-05	-0.933852	0.933902	1	1.0001	1.69577	-0.695675	10	9.99993	6.69032	3.30962	-0.744354	-0.874687	0.130333	11.3874	10.2062	-1.18118	1.75654	-0.332715	2.08925	-1.27604	-1.1587	-0.117338	1.55059	1.54875	0.00184274	1.58836	-1.47247	3.06082
2	23	1	1	1	1	1	1	-3	-2.994	-3.23279	0.238785	3	3.00188	2.55824	-0.44364	-2	-1.99725	-0.577079	-1.42017	2	2.00003	2.02885	-0.0288258	-3	-2.99999	-0.487043	-2.51295	-2	-2.00008	-0.141032	-1.85905	-0.633522	-0.884506	0.250984	6.91552	6.19598	-0.719535	-1.53968	-1.00547	-0.534209	-0.979553	2.32117	-3.30072	-1.96866	-1.91754	-0.0511135	-4.70525	-3.59552	-1.10973
2	23	1	1	1	1	2	1	-3	-2.994	-3.10109	0.107086	3	3.00188	2.67488	-0.327001	-2	-1.99725	-0.335738	-1.66152	2	2.00012	2.02908	-0.0289538	-3	-2.99998	-1.06352	-1.93647	-2	-2.0001	-0.674845	-1.32526	-0.633537	-1.00921	0.375671	6.91542	5.93418	-0.981237	-1.53961	-0.894013	-0.645594	-0.979439	2.54831	-3.52775	-1.96864	-1.88425	-0.0843947	-4.70555	-4.57802	-0.127523
2	23	1	1	1	1	2	2	-3	-2.994	-3.16134	0.167336	3	3.00188	2.5368	-0.465083	-2	-1.99725	-0.508638	-1.48862	2	2.00012	1.95211	0.048014	-3	-2.99998	-0.756383	-2.2436	-2	-2.0001	-0.177743	-1.82236	-0.633537	-1.06498	0.431442	6.91542	6.49444	-0.420981	-1.53961	-1.38433	-0.155275	-0.979439	2.36137	-3.34081	-1.96864	-2.43256	0.463914	-4.70555	-2.26375	-2.4418
3	32	0	1	0	1	1	1	-2	-1.99685	-2.13017	0.133316	4	3.99273	1.42985	-2.56289	-2	-1.99963	-1.1282	-0.871426	3	2.99996	-0.206328	3.20629	1	0.999896	2.75367	-1.75377	4	4.00013	1.15996	2.84017	-0.00785065	-0.404945	0.397095	8.72648	5.76526	-2.96122	0.593804	0.328916	0.264888	0.418659	-0.956961	1.37562	0.156735	0.872261	-0.715526	0.387905	-2.95396	3.34186
3	32	0	1	0	1	2	1	-2	-1.99695	-2.0864	0.0894547	4	3.99273	1.32108	-2.67165	-2	-1.99965	-1.35394	-0.645708	3	2.99999	-0.238726	3.23872	1	0.999908	2.81768	-1.81778	4	3.99984	1.85013	2.14971	-0.00794983	-0.481842	0.473892	8.7271	5.63069	-3.0958	0.59373	0.46908	0.12465	0.41873	-1.14963	1.56836	0.156588	0.37576	-0.219171	0.387369	-3.29831	3.68639
3	32	0	1	0	1	2	2	-2	-1.99695	-2.11573	0.118881	4	3.99273	1.34777	-2.64496	-2	-1.99965	-1.46326	-0.53637	3	2.99999	-0.215896	3.21586	1	0.999908	2.68017	-1.68027	4	3.99984	1.96278	2.0373	-0.00794983	-0.445351	0.435913	8.7271	5.69259	-3.03452	0.59373	0.369847	0.222086	0.41873	-1.26137	1.67959	0.156588	0.313989	-0.157659	0.387369	-3.1223	3.50967
4	45	1	1	1	1	1	1	0	-5.34e-05	0.157249	-0.157303	2	1.99992	2.05522	0.0552998	-2	-2.00001	1.05061	-3.05063	0	5.29e-05	-0.182127	0.18218	0	-5.46e-05	-0.0210191	0.0209644	4	4.00005	-0.0481627	4.04822	-1.24359	-0.529213	-0.714378	6.31382	6.36469	0.0508695	2.08913	2.08261	0.00652361	3.15096	1.56029	1.59068	0.415041	-0.395216	0.810257	-4.53519	-3.48004	-1.05515
4	45	1	1	1	1	2	1	0	-5.34e-05	0.155869	-0.155922	2	1.99992	2.02179	0.0218737	-2	-2.00001	0.909398	-2.90941	0	5.29e-05	-0.245177	0.24523	0	-5.46e-05	0.115868	-0.115922	4	4.00005	0.149038	3.85102	-1.24359	-0.37738	-0.866211	6.31382	6.27439	-0.0394311	2.08913	1.85251	0.236624	3.15096	1.47196	1.679	0.415041	-0.33722	0.752261	-4.53519	-3.16308	-1.37211
4	45	1	1	1	1	2	2	0	-5.34e-05	0.174599	-0.174652	2	1.99992	2.00552	0.00559902	-2	-2.00001	0.588653	-2.58867	0	5.29e-05	-0.245454	0.245507	0	-5.46e-05	0.0298617	-0.0299164	4	4.00005	0.448022	3.55203	-1.24359	-0.318359	-0.925232	6.31382	6.13434	-0.179476	2.08913	2.55877	-0.469641	3.15096	1.64385	1.50711	0.415041	0.320771	0.0942697	-4.53519	-4.38997	-0.145218
5	29	0	1	1	1	1	1	-1	-0.999985	-0.868851	-0.131134	5	5.00007	8.54183	3.54176	3	3	6.3785	-3.3785	0	3.14e-05	0.589674	-0.589642	0	-1.61e-05	-0.751505	0.751489	0	-3.58e-05	-5.39728	5.39724	0.181946	0.232079	-0.0501328	14.6098	18.1871	3.57724	2.60703	3.78635	-1.17933	-0.766494	0.16611	-0.932605	-0.0962233	-1.39674	1.30051	-4.38165	-10.2506	5.86897
5	29	0	1	1	1	2	1	-1	-0.999985	-0.87796	-0.122025	5	5.00007	8.82481	3.82474	3	3	6.5413	-3.5413	0	3.14e-05	0.762326	-0.762295	0	-1.61e-05	-0.993622	0.993606	0	-3.58e-05	-6.22465	6.22462	0.181946	0.412682	-0.230736	14.6092	18.2481	3.63888	2.60731	3.78968	-1.18237	-0.766562	0.3314	-1.09796	-0.0964802	-0.28567	0.18919	-4.38162	-10.163	5.7814
5	29	0	1	1	1	2	2	-1	-0.999985	-0.923988	-0.0759964	5	5.00007	8.76051	3.76044	3	3	6.41791	-3.41791	0	3.14e-05	0.675306	-0.675274	0	-1.61e-05	-0.637867	0.637851	0	-3.58e-05	-5.99556	5.99552	0.181946	0.311707	-0.129761	14.6092	18.213	3.60387	2.60731	3.74275	-1.13544	-0.766562	0.198543	-0.965104	-0.0964802	-1.03866	0.942178	-4.38162	-10.1486	5.76699
6	21	0	1	1	1	1	1	3	2.99702	3.11613	-0.119102	6	5.99605	6.92589	0.929833	0	0.00040561	2.13007	-2.12966	-2	-2.00013	-1.46768	-0.532452	-1.5	-1.49999	-2.73519	1.2352	3	2.99985	0.0958433	2.90401	8.39463	9.3096	-0.91497	2.99605	3.40139	0.405334	3.34281	3.48225	-0.139434	-4.0517	-3.01791	-1.03379	-3.54173	-5.22825	1.68653	-2.75062	-3.89262	1.142
6	21	0	1	1	1	2	1	3	2.99708	3.05355	-0.0564728	6	5.99645	6.90585	0.909394	0	1.43e-05	2.1087	-2.10868	-2	-2.00024	-1.31421	-0.686034	-1.5	-1.5001	-2.74239	1.24229	3	3.00008	0.121138	2.87894	8.38695	9.22147	-0.834518	2.99677	3.36541	0.368639	3.34207	3.45404	-0.111978	-4.05169	-2.96669	-1.085	-3.54159	-5.36511	1.82353	-2.75072	-4.11878	1.36806
6	21	0	1	1	1	2	2	3	2.99708	3.08565	-0.0885696	6	5.99645	7.29135	1.29489	0	1.43e-05	2.74516	-2.74515	-2	-2.00024	-1.44269	-0.557554	-1.5	-1.5001	-2.61009	1.10999	3	3.00008	-1.77428	4.77435	8.38695	9.23248	-0.845535	2.99677	3.31488	0.318108	3.34207	3.47994	-0.13787	-4.05169	-3.00452	-1.04717	-3.54159	-5.21579	1.6742	-2.75072	-4.06116	1.31044
7	25	1	1	1	0	1	1	2	2.00008	2.6497	-0.649612	5	5.00063	4.55212	-0.448502	3	3.00035	0.266811	2.73353	0	0.000190975	-2.24645	2.24664	0	0.000172151	-0.508586	0.508758	-6	-5.99989	-1.48348	-4.51641	1.38921	0.340508	1.04871	12.9407	12.7925	-0.148208	1.55764	-2.37879	3.93643	-2.03976	-1.79168	-0.248076	-0.0890973	1.03674	-1.12583	-6.92217	-0.668335	-6.25384
7	25	1	1	1	0	2	1	2	2.00008	2.60238	-0.602295	5	5.00078	4.57416	-0.426617	3	3.00008	0.22202	2.77806	0	0.000212541	-2.16456	2.16477	0	-8.47e-05	-0.440166	0.440081	-6	-6.00005	-1.44551	-4.55454	1.38904	0.104561	1.28448	12.9375	12.9607	0.0231276	1.55639	-2.31144	3.86783	-2.03975	-1.65644	-0.383317	-0.0890843	0.396206	-0.48529	-6.92221	-0.0250982	-6.89711
7	25	1	1	1	0	2	2	2	2.00008	2.71401	-0.713928	5	5.00078	4.72385	-0.276927	3	3.00008	0.49897	2.50111	0	0.000212541	-2.19913	2.19934	0	-8.47e-05	-0.553906	0.553822	-6	-6.00005	-2.10948	-3.89057	1.38904	0.217819	1.17122	12.9375	12.9248	-0.0126972	1.55639	-2.41012	3.96651	-2.03975	-1.79827	-0.24148	-0.0890843	0.563601	-0.652686	-6.92221	0.0440546	-6.96627
8	16	0	1	1	1	1	1	-2.5	-2.49387	-3.76653	1.27267	4	3.99999	1.85807	-2.14192	0	8.36e-05	-0.66638	0.666464	0	0.000217982	0.540653	-0.540435	4	3.99991	5.72208	-1.72217	-2	-2.00008	-0.570835	-1.42925	-5.21407	-6.51979	1.30572	11.3861	9.07952	-2.30654	2.87391	1.82266	1.05125	5.23296	4.57657	0.656387	7.03477	9.21825	-2.18347	-9.76797	-10.3637	0.595714
8	16	0	1	1	1	2	1	-2.5	-2.49397	-3.71857	1.22461	4	4	2.08333	-1.91667	0	6.72e-05	0.0146987	-0.0146315	0	0.000195864	0.655566	-0.65537	4	4.00002	5.17762	-1.1776	-2	-2.0002	-1.67784	-0.322358	-5.21444	-6.59937	1.38493	11.3864	9.20841	-2.17795	2.87354	1.91814	0.955405	5.23276	4.32351	0.909252	7.03484	8.03531	-1.00047	-9.76785	-9.79016	0.0223055
8	16	0	1	1	1	2	2	-2.5	-2.49397	-3.66979	1.17583	4	4	1.98735	-2.01265	0	6.72e-05	-0.123324	0.123392	0	0.000195864	0.541639	-0.541443	4	4.00002	5.35684	-1.35681	-2	-2.0002	-1.45067	-0.549531	-5.21444	-6.75712	1.54268	11.3864	9.12438	-2.26198	2.87354	1.70156	1.17198	5.23276	4.52772	0.70504	7.03484	7.79331	-0.758472	-9.76785	-9.65838	-0.109475
9	17	1	1	1	0	1	1	0	-7.63e-06	-1.43398	1.43397	5	4.99997	3.70191	-1.29806	-2	-2.00001	-1.24125	-0.758751	0	-7.2e-06	0.47748	-0.477487	0	7.63e-05	0.878123	-0.878047	3	3.00007	1.62032	1.37974	-0.335197	-1.55807	1.22287	9.89594	9.35187	-0.544066	-2.53325	-4.08353	1.55027	1.19063	1.18424	0.00638998	-0.46091	1.09419	-1.5551	5.79006	2.47787	3.3122
9	17	1	1	1	0	2	1	0	-7.63e-06	-1.41849	1.41848	5	4.99997	3.60672	-1.39325	-2	-2.00002	-1.44001	-0.560007	0	-1.83e-05	0.475184	-0.475203	0	-3.68e-05	0.760169	-0.760206	3	2.99997	2.2387	0.761265	-0.335289	-1.55671	1.22142	9.89596	9.73606	-0.159892	-2.53333	-4.3392	1.80587	1.19056	1.17363	0.016928	-0.461051	1.07854	-1.53959	5.7902	3.61665	2.17355
9	17	1	1	1	0	2	2	0	-7.63e-06	-1.46574	1.46573	5	4.99997	3.6524	-1.34757	-2	-2.00002	-1.39394	-0.606072	0	-1.83e-05	0.512716	-0.512735	0	-3.68e-05	0.967416	-0.967453	3	2.99997	2.03424	0.96573	-0.335289	-1.53296	1.19767	9.89596	9.96727	0.0713139	-2.53333	-4.3889	1.85557	1.19056	1.02307	0.167485	-0.461051	0.878972	-1.34002	5.7902	4.22402	1.56618
10	17	0	1	1	1	1	1	1.5	1.49993	0.582016	0.917915	4	3.99967	2.97919	-1.02048	0	5.39e-06	-2.68895	2.68895	0	4.78e-06	-0.796606	0.796611	0	1.87e-05	0.903182	-0.903163	5	4.99985	3.26881	1.73105	-1.23295	-0.67543	-0.557518	-0.222968	-0.370781	-0.147813	2.49376	0.134781	2.35898	2.82793	1.30291	1.52502	-0.505423	0.509573	-1.015	2.01699	-0.386155	2.40315
10	17	0	1	1	1	2	1	1.5	1.49993	0.607285	0.892647	4	3.99988	2.84194	-1.15794	0	1.86e-05	-2.93768	2.9377	0	-1.97e-05	-0.747231	0.747212	0	8.32e-06	0.677708	-0.677699	5	4.99985	3.9706	1.02925	-1.23304	-0.907394	-0.325645	-0.222759	-0.255145	-0.0323859	2.49377	-0.142892	2.63666	2.82798	1.21806	1.60992	-0.505416	-0.113629	-0.391787	2.01697	-0.182324	2.1993
10	17	0	1	1	1	2	2	1.5	1.49993	0.569199	0.930946	4	3.99988	2.83129	-1.16798	0	1.86e-05	-3.0125	3.01268	0	-1.97e-05	-0.695233	0.695227	0	8.32e-06	0.894012	-0.894105	5	4.99985	3.97808	1.02191	-1.23304	-0.824829	-0.407921	-0.222759	-0.356237	-0.132076	2.49377	-0.0132033	2.50735	2.82798	1.29811	1.53007	-0.505416	0.139802	-0.645252	2.01697	-0.274763	2.29138
6441336								0	0		0.0415014	0.0415014			-1.43911	1.43911			1.19427	1.19427			1.00011	1.00011			-0.728306	0.728306			2.60305	2.60305		0.234546	0.234546		-1.27809	1.27809		1.95418	1.95418		-0.0698312	0.0698312		0.608829	0.608829		3.32394
4187538								-3	3		0.171069	0.171069			-0.411908	0.411908			-1.52344	1.52344			-0.0032552	0.0032552			-2.23101	2.23101			-1.66889	1.66889		0.352699	0.352699		-0.707251	0.707251		-0.445026	0.445026		-3.38976	3.38976		0.109469	0.109469		-1.22635
331578								-2	2		0.113884	0.113884			-2.6265	2.6265			-0.684501	0.684501			3.22029	3.22029			-1.75061	1.75061			2.34239	2.34239		0.435633	0.435633		-3.03051	3.03051		0.203875	0.203875		1.54119	1.54119		-0.364119	0.364119		3.51264
3599209								0	0		-0.162626	0.162626			0.0275908	0.0275908			-2.84957	2.84957			0.224306	0.224306			-0.0416247	0.0416247			3.81709	3.81709		-0.835274	0.835274		-0.0560125	0.0560125		-0.0754978	0.0754978		1.59226	1.59226		0.552263	0.552263		-0.857493
9625790								-1	1		-0.109718	0.109718			3.70898	3.70898			-3.4459	3.4459			-0.675737	0.675737			0.794315	0.794315			5.87246	5.87246		-0.136877	0.136877		3.60666	3.60666		-1.16571	1.16571		-0.998556	0.998556		0.810626	0.810626		5.80579
4671088								3	3		-0.0880481	0.0880481			1.04471	1.04471			-2.32783	2.32783			-0.592013	0.592013			1.19583	1.19583			3.5191	3.5191		-0.865008	0.865008		0.364027	0.364027		-0.129761	0.129761		-1.05532	1.05532		1.72809	1.72809		1.2735
6197153								2	2		-0.655278	0.655278			-0.384015	0.384015			2.6709	2.6709			2.20358	2.20358			0.500887	0.500887			-4.32051	4.32051		1.16814	1.16814		-0.0459259	0.0459259		3.92359	3.92359		-0.290958	0.290958		-0.754602	0.754602		-6.70574
8647303								-2.5	2.5		1.22437	1.22437			-2.02375	2.02375			0.258408	0.258408			-0.579083	0.579083			-1.41886	1.41886			-0.767046	0.767046		1.41111	1.41111		-2.24882	2.24882		1.05954	1.05954		0.756893	0.756893		-1.31414	1.31414		0.169515
8661125								0	0		1.43939	1.43939			-1.34629	1.34629			-0.64161	0.64161			-0.488475	0.488475			-0.868569	0.868569			1.03558	1.03558		1.21399	1.21399		-0.210881	0.210881		1.73724	1.73724		0.063601	0.063601		-1.47824	1.47824		2.35064
5768984								1.5	1.5		0.913836	0.913836			-1.11547	1.11547			2.87978	2.87978			0.74635	0.74635			-0.824989	0.824989			1.26074	1.26074		-0.430361	0.430361		-0.104092	0.104092		2.501	2.501		1.555	1.555		-0.684013	0.684013		2.29794
									1.5		0.288838	0.491972			-0.456576	1.41283			-0.446949	1.84762			0.505608	0.973321			-0.537293	1.0355			1.3694	2.72069		0.254859	0.708363		-0.37109	1.16523		0.956342	1.31954		-0.0295475	1.13134		-0.0785835	0.840438		0.994438
[truncated: 14 more columns]

## Sheet: Blad2
Observer		Poging
1= Jeroen		1= 1ste poging
2= Frank		2 = 2e poging
geslacht	1=man	0= vrouw
Brackets post op	1 = ja	0 = nee
Ok type	1 = BK eerst	0 = Onderkaak eerst
Kin	1=ja	0=nee
CBCT post op	1= IMF	0 wafer	2 zonder iets
folluw op	maanden
Dichtbijten post-op CBCT	1=ja	0=nee/incorrect
